# Supplementary material for: Wafer-scale van der Waals Dielectrics of Inorganic Molecular Crystals
Source: Research Square preprint supplement (doi:10.21203/rs.3.rs-115496/v1), 2021-01-06
Supplement: Supplementary file 1 [file b58f409d21d8b9dda8cb68a0.docx]

**Supplementary information**

for

**Wafer-scale van der Waals Dielectrics of Inorganic Molecular Crystals**

Kailang Liu1, Bao Jin1, Wei Han1, Xiang Chen2, Penglai Gong3, Li Huang3, Yinghe Zhao1, Liang Li4, Sanjun Yang1, Xiaozong Hu5, Junyuan Duan1, Lixin Liu1, Fuwei Zhuge1, and Tianyou Zhai1*

1. State Key Laboratory of Materials Processing and Die & Mould Technology, School of Materials Science and Engineering, Huazhong University of Science and Technology, Wuhan, China
2. Nano and Heterogeneous Materials Center, School of Materials Science and Engineering, Nanjing University of Science and Technology, Nanjing, China.
3. Department of Physics, Southern University of Science and Technology, Shenzhen, China.
4. Institutes of Physical Science and Information Technology, Anhui University, Hefei, China.
5. Green Catalysis Center, College of Chemistry, Zhengzhou University, Zhengzhou, China

*To whom correspondence should be addressed: [zhaity@hust.edu.cn](mailto:zhaity@hust.edu.cn)

We grind the Sb2O3 powder before its uploading into the STED system, as demonstrated in Figure S1. The evaporation temperature is automatically controlled according to the deposition rate settings. To test the evaporation temperature, we carried out the TGA of Sb2O3 powder and the evaporation temperature is measured to be (490℃) at ambient pressure. We anticipate that the evaporation temperature in our STED system should be much lower for its high vacuum.


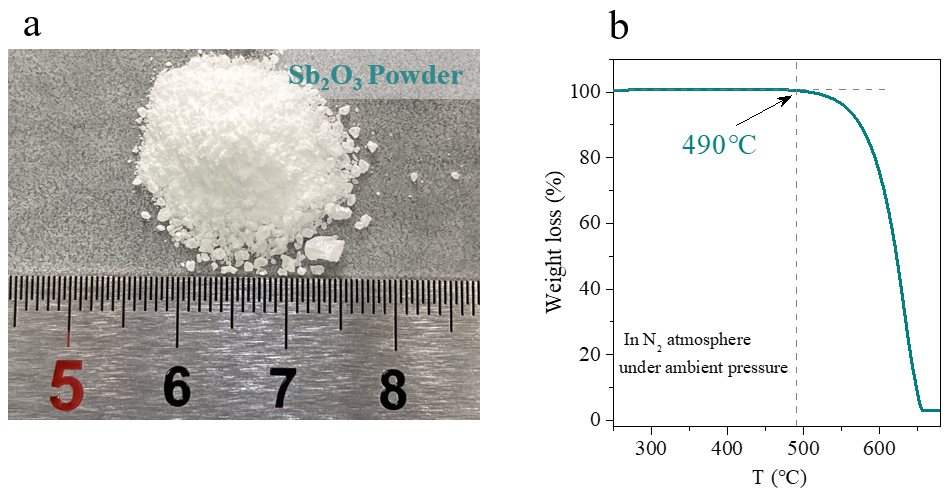
Figure S1: a, High-purity Sb2O3 powder. b, its thermogravimetric analysis under ambient pressure in N2 atmosphere.


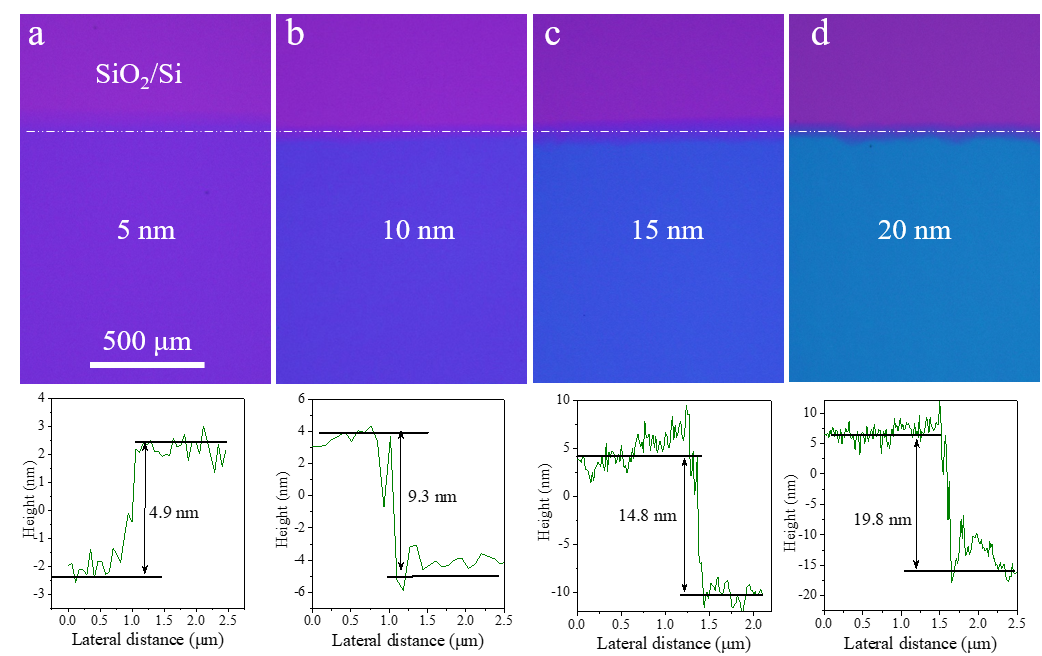


Figure S2: Optical images of Sb2O3 film with precisely controlled thickness deposited on SiO2/Si substrate and their corresponding AFM profiles for thickness measurement. The bare parts on substrates are covered by a piece of PDMS during the deposition, which is peeled off before taking these images for clear contrasts.


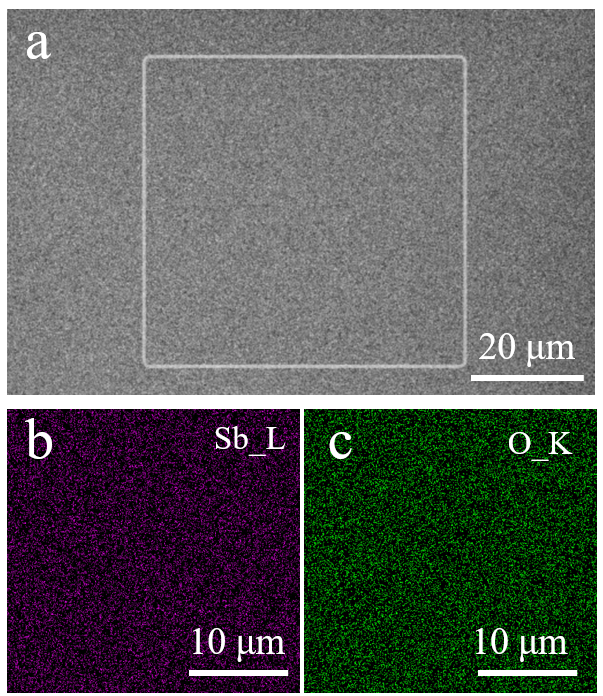


Figure S3: SEM image of Sb2O3 film and the elemental maps of Sb and O. a, SEM image of Sb2O3 deposited on SiO2/Si substrate. b and c are respectively the EDX elemental maps of Sb and O, acquired from the square indicated in a.

**First-principle calculations**

The first-principles calculations were performed in the Vienna *ab initio* simulation package (VASP) [1] with a plane-wave basis set. The projector-augmented-wave method (PAW) [2] describes the interactions between core and valence electrons and the generalized gradient approximation (GGA) of Perdew-Burke-Ernzerh (PBE) [3] deals with the exchange-correlation interaction. The optb88-vdW method[4] was adopted in describing the van der Waals interactions (vdW) interaction. The cutoff energy is set to be 500 eV. The screened-exchange HSE06[5] functional is used to get more accurate electronic properties based on the optimized geometries.

For density of states calculation of Sb2O3, A k-point sampling gird of 4×4×4 was employed to sample the first Brillouin zone. The lattice parameters of bulk Sb2O3 were fully optimized with the inclusion of atom relaxation, yielding a = 11.14 Å, in line with the experimental data (11.10) [6]. Our calculated lattice constants were less than the other theoretical results (11.54 Å) [7, 8] because they neglected the vdW forces among discrete Sb2O3 molecular units. Based on the optimized structures, the density of states (DOS) of bulk and 5-slab Sb2O3 were obtained by the HSE06 method. It showed that both of them display a similar profile and band-gap of 4.065 eV, in agreement with our experimental data (4.0 eV). The thickness-independent band-gap further ensured of the pristine vdW interaction among those Sb2O3 molecular units.

The band alignment between Sb2O3 and MoS2 was predicted by the HSE06 functional. The 5-slab Sb2O3 was built to extract its energy level of valance band maximum (VBM) and conductive band minimum (CBM) relative to the vacuum level. They were -7.23 eV and -3.16 eV for the VBM and CBM, respectively. For MoS2, we used the data from the Ref. [9]

For the calculations of vacancy formation energy, we define the vacancy formation energy as Ef=Em-Efr-Eopt, where Em is the energy of pristine Sb2O3 molecule, Efr stands for the energy of free O, Sb or O2, respectively corresponding to the three types of vacancies, and Eopt stands for the optimized energy of the defected molecules in the corresponding types.

To calculate the adsorption of H2O and O2 onto Sb2O3 molecule, we define the adsorption energy as Ea=Egas/Sb2O3-Em-Egas, where Ea is the adsorption energy, Egas/Sb2O3 isthe total energy of gas adsorbed on Sb2O3 molecule and Em, Egas are respectively the energy of pristine Sb2O3 and gas molecule. Typical adsorption types of H2O and O2 were taken into consideration.

Table S1: The peak positions of Sb2O3 Raman spectrum and their vibration modes, all of which belong to the intra-molecular modes.


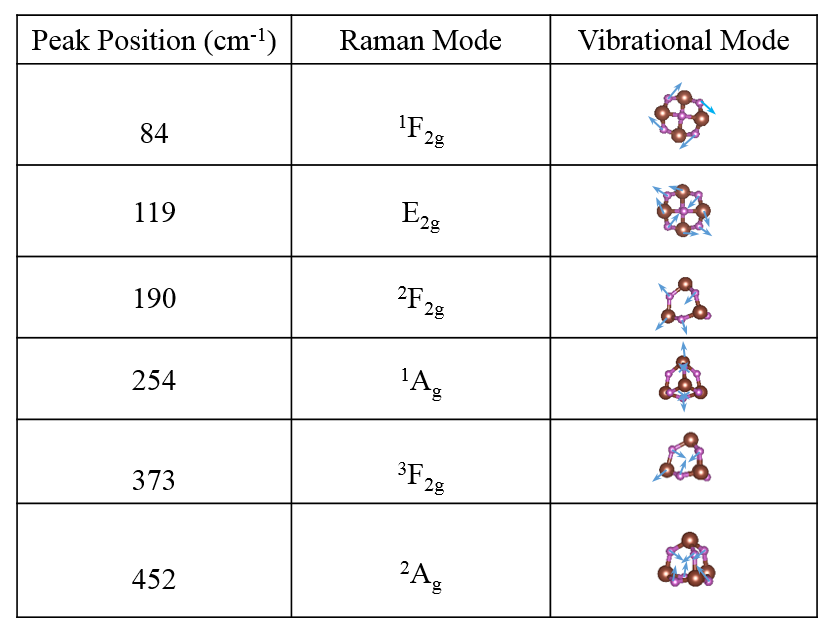


Table S2: The formation energy of O vacancy, Sb vacancy and O-O vacancy in a Sb2O3 molecule obtained by first-principle calculations.


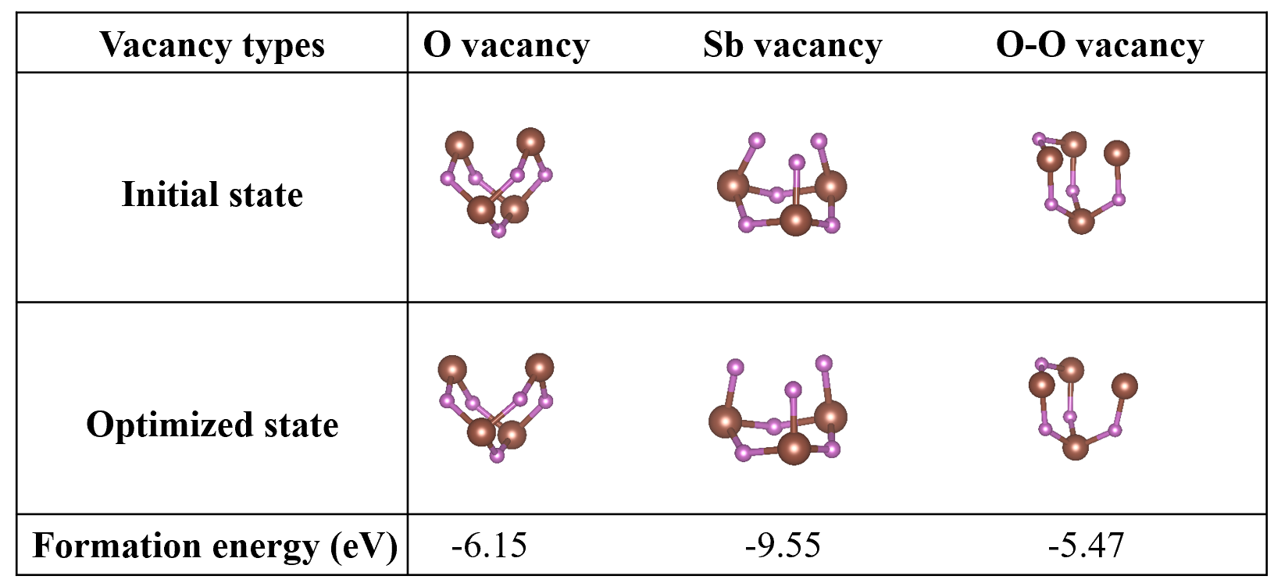


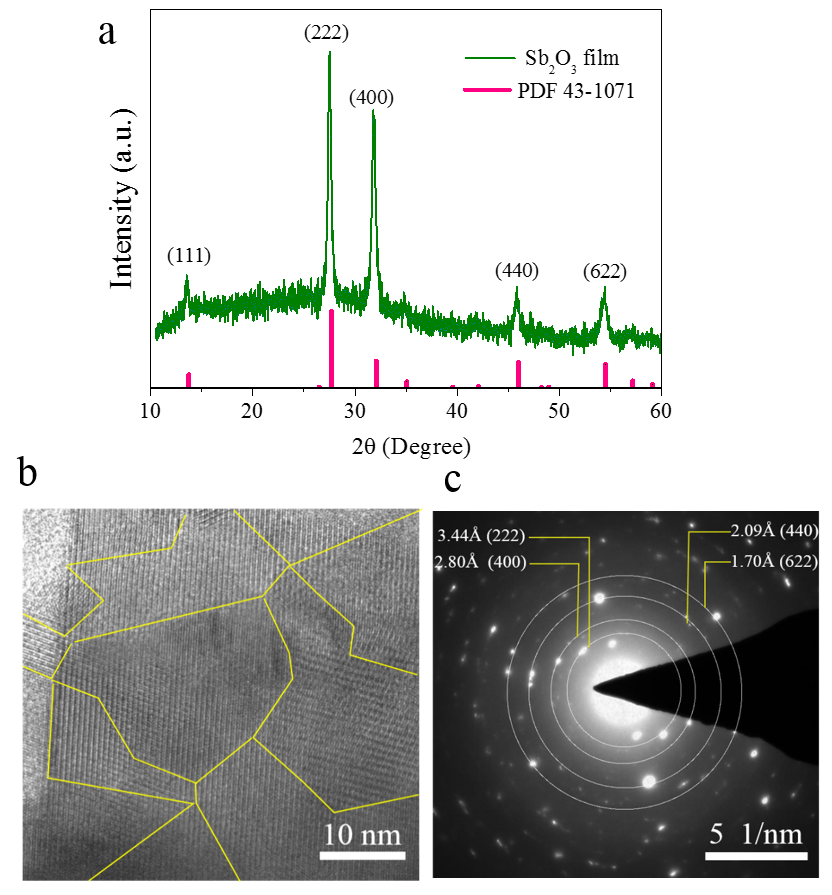


Figure S4: The polycrystalline structure of our Sb2O3 film. a, typical XRD pattern of Sb2O3 film of 40 nm, suggesting its polycrystalline structure. b, HRTEM image of Sb2O3 fim, showing the typical grain size of our Sb2O3 fim. c, Selected area electron diffraction of Sb2O3, confirming its polycrystalline structure.


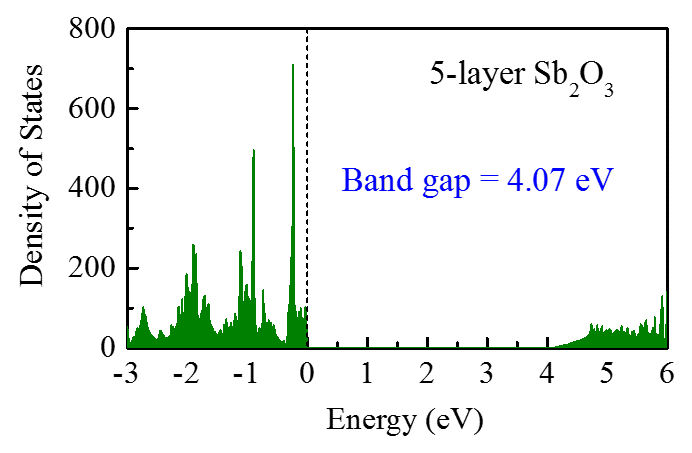


Figure S5: The density of states of Sb2O3 film with 5 molecular layers and its bandgap.


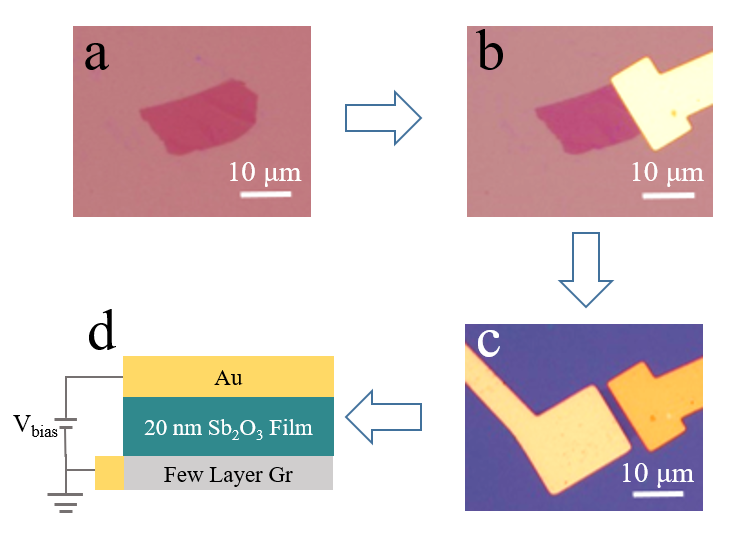


Figure S6: The process flow of device fabrication for Sb2O3 breakdown measurement. a, Few-layer graphene flake is exfoliated onto SiO2/Si substrate. b, Bottom electrode is defined and fabricated. c, 20 nm Sb2O3 is deposited and top electrode is fabricated. d, Schematic figure of the device for breakdown measurement.


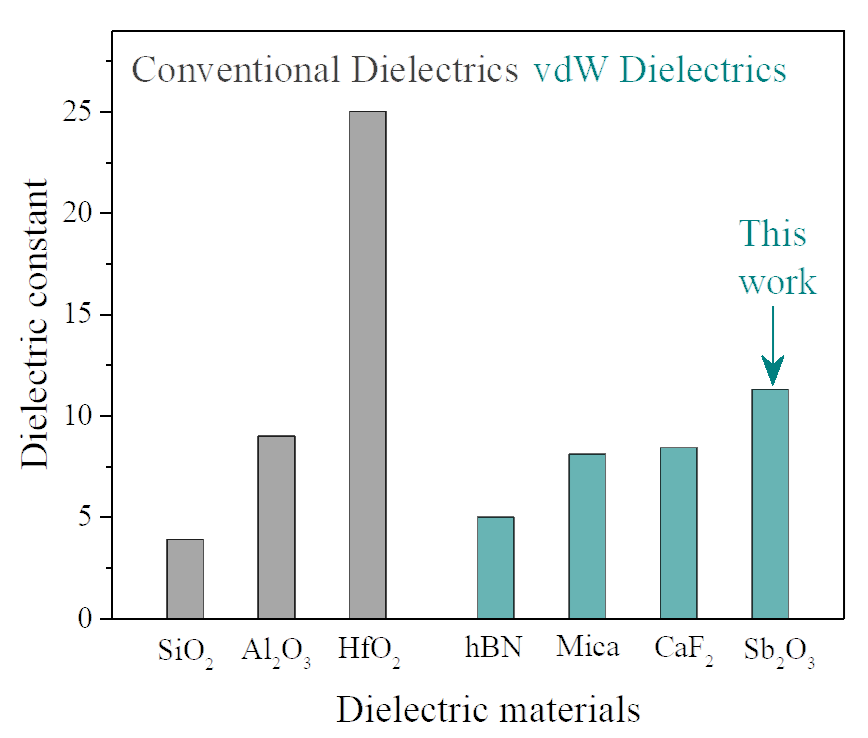


Figure S7: Dielectric constants of conventional dielectric oxides and the reported vdW (quasi-vdW) dielectrics.


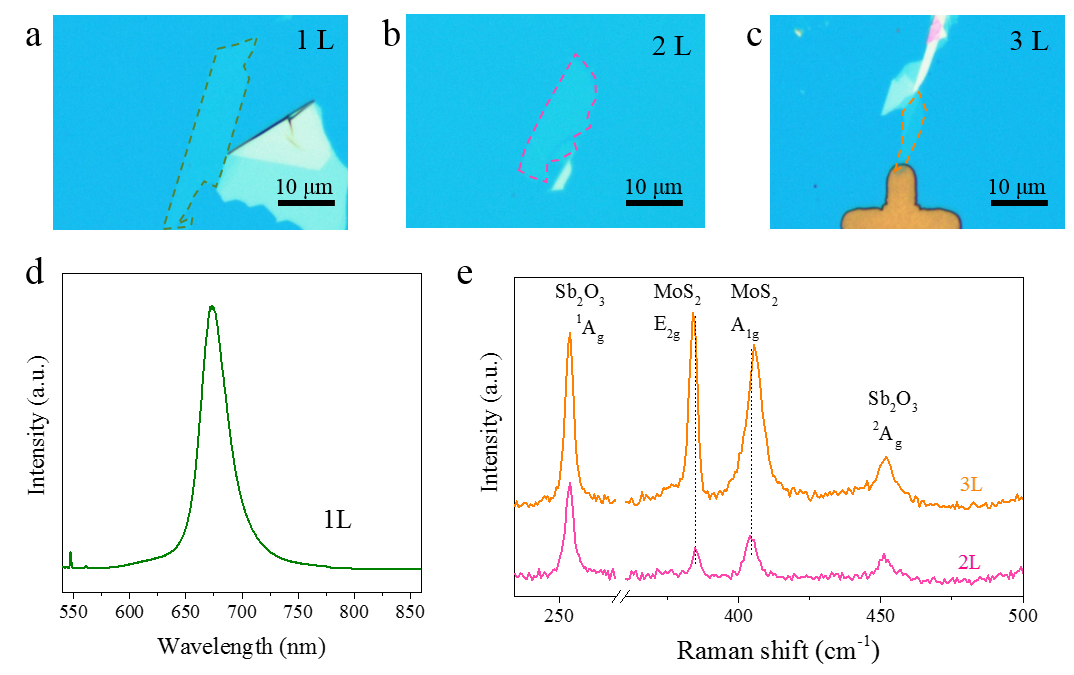


Figure S8: Confirming the layer number of MoS2 via optical approaches. a, b, and c are respectively the as-exfoliated monolayer, bilayer and trilayer MoS2 on Sb2O3 substrate. d, photoluminescence spectrum of monolayer MoS2. e, Raman spectra of bilayer and trilayer MoS2 on Sb2O3 substrate.


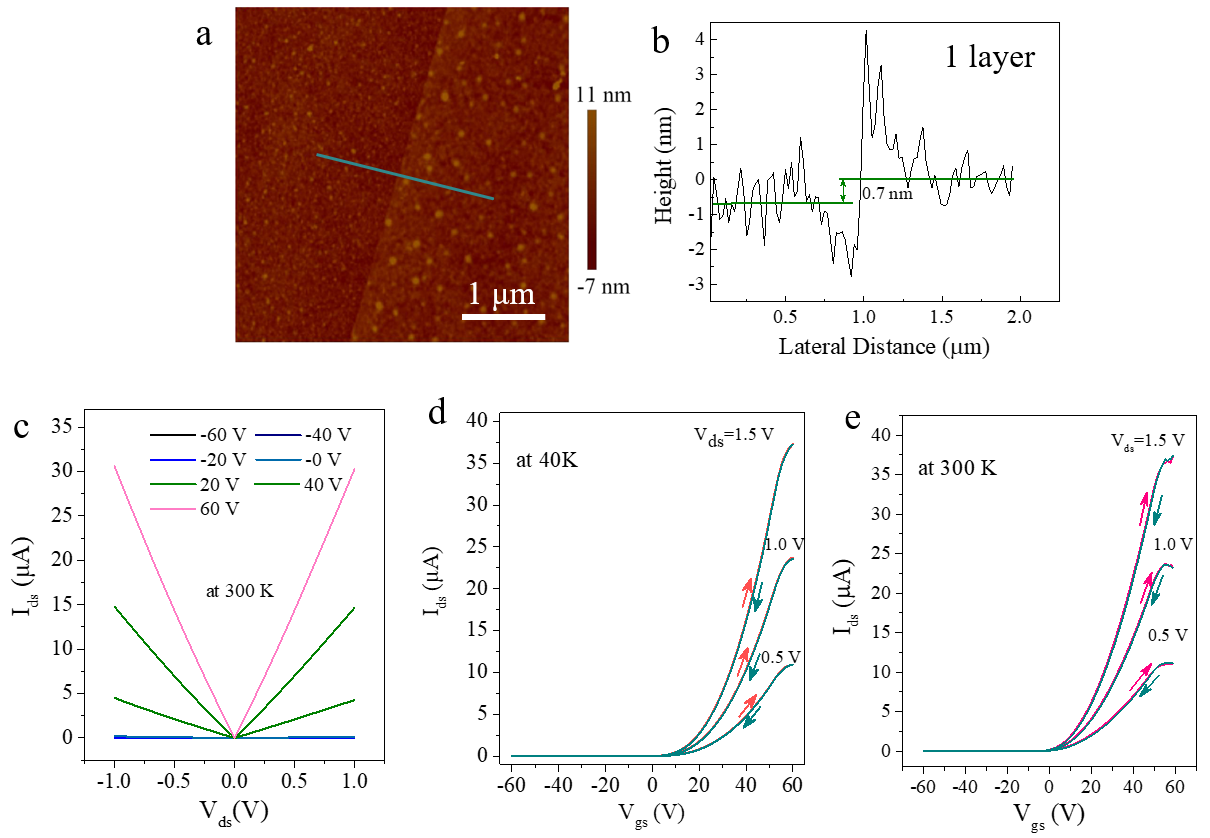


Figure S9: Electrical performance of monolayer MoS2/Sb2O3 FET. a, AFM image of the monolayer MoS2 on Sb2O3. b, height profile at the position indicated in a. c Output curves of monolayer MoS2 FET measured at 300 K. d and e, Transfer characteristic curves of monolayer MoS2/Sb2O3 FET with different bias voltage Vds measured at 40 K and 300 K respectively.


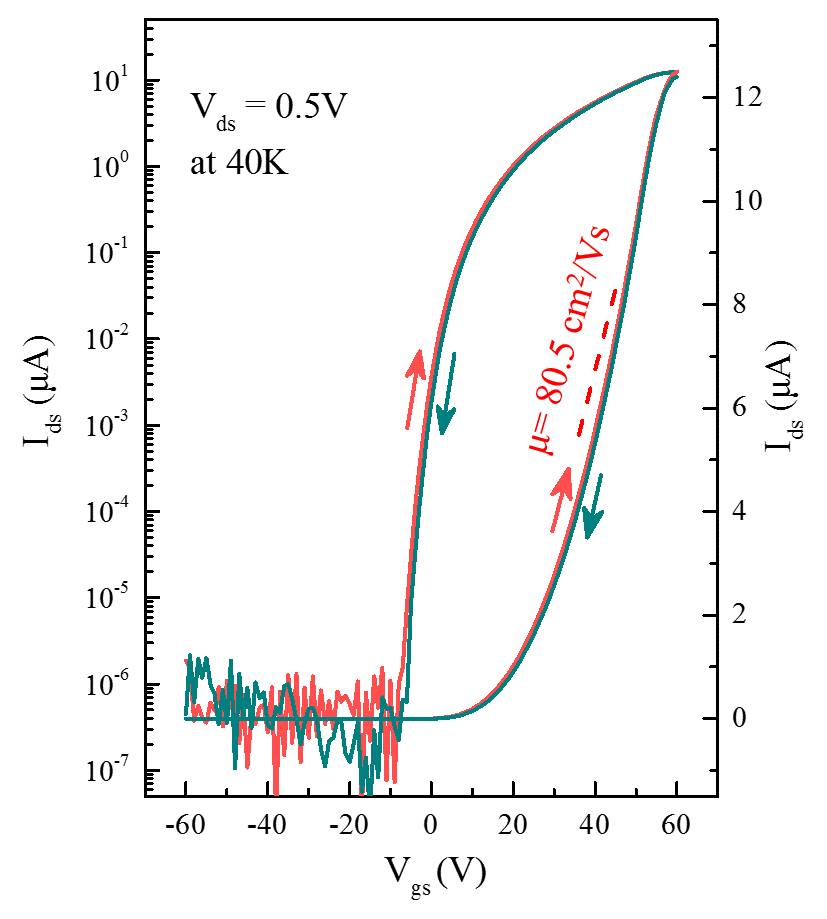


Figure S10: Transfer characteristic curve of another monolayer MoS2/Sb2O3 FET, displaying similar electron mobility and on/off ratio.


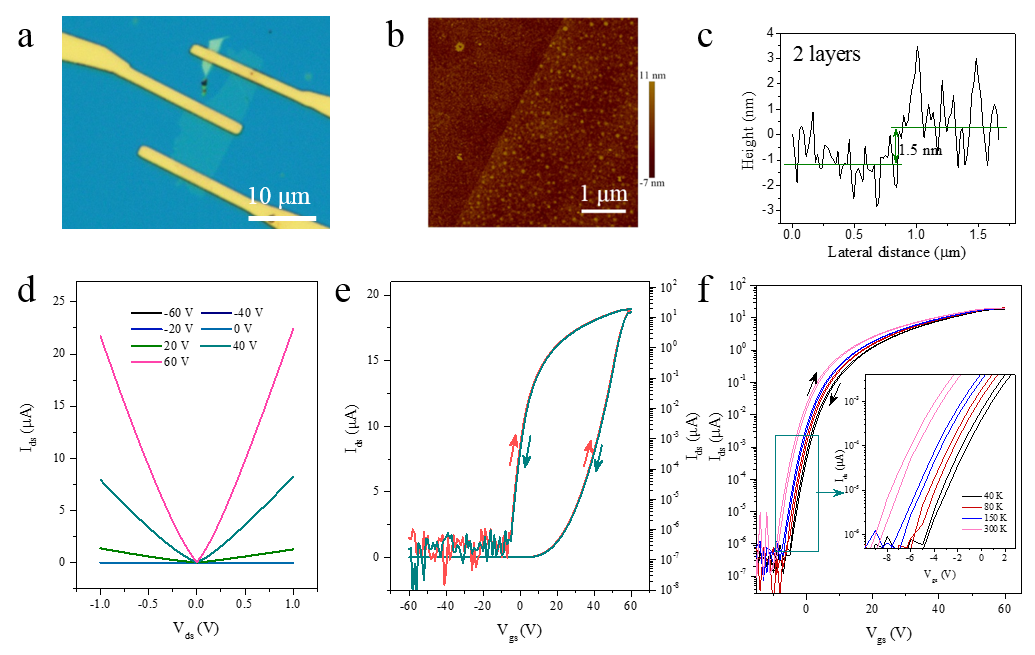
Figure S11: Electrical performance of bilayer MoS2/Sb2O3 FET. a, Optical image of bilayer MoS2/Sb2O3 FET. b, AFM image of channel bilayer MoS2. c, the profile from b confirms the thickness of MoS2. d, the output curves of bilayer MoS2/Sb2O3 FET at 40 K. e, the transfer characteristic curves of bilayer MoS2/Sb2O3 FET. f, the temperature-dependent transfer characteristic curves of bilayer MoS2/Sb2O3 FET and the corresponding hysteresis is highlighted (inset).


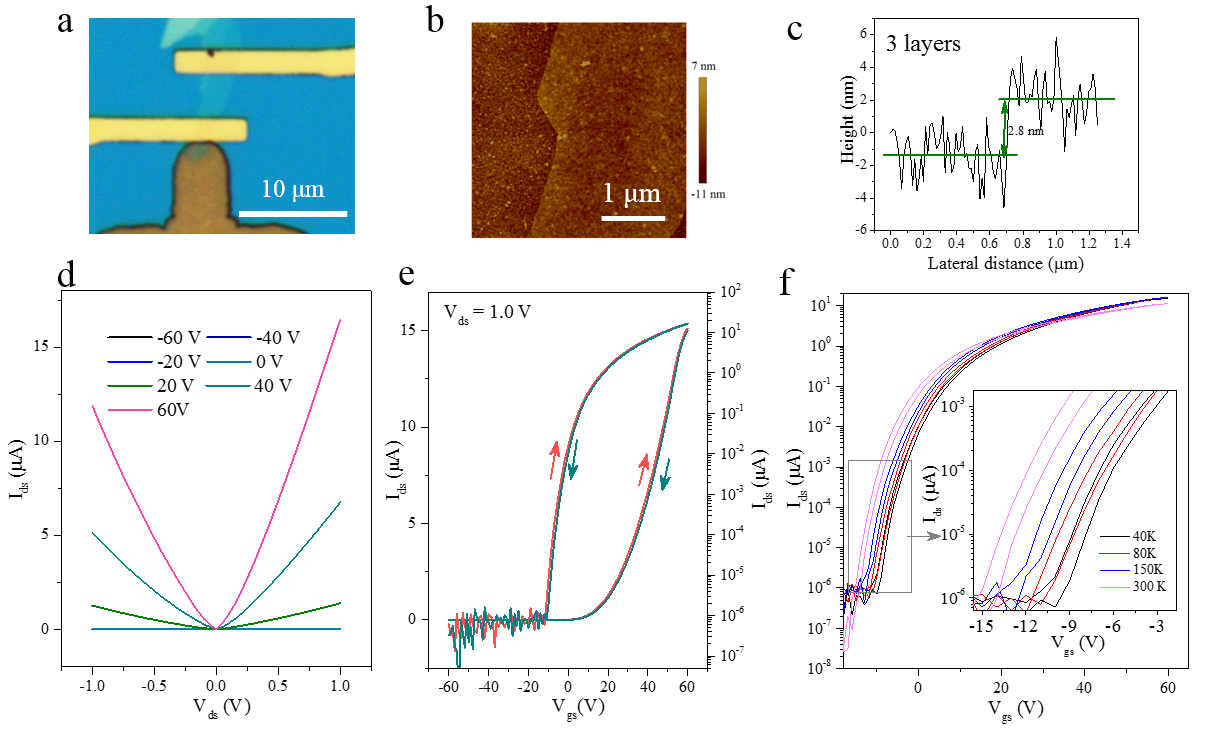


Figure S12: Electrical performance of trilayer MoS2/Sb2O3 FET. a, Optical image of trilayer MoS2/Sb2O3 FET. b, AFM image of channel trilayer MoS2. c, the profile from b confirms the trilayer MoS2. d, the output curves of trilayer MoS2/Sb2O3 FET at 40 K. e, the transfer characteristic curves of trilayer MoS2/Sb2O3 FET. f, the temperature-dependent transfer characteristic curves of trilayer MoS2/Sb2O3 FET and the corresponding hysteresis is highlighted (inset).

Table S3: Typical gas adsorption onto a Sb2O3 molecule.


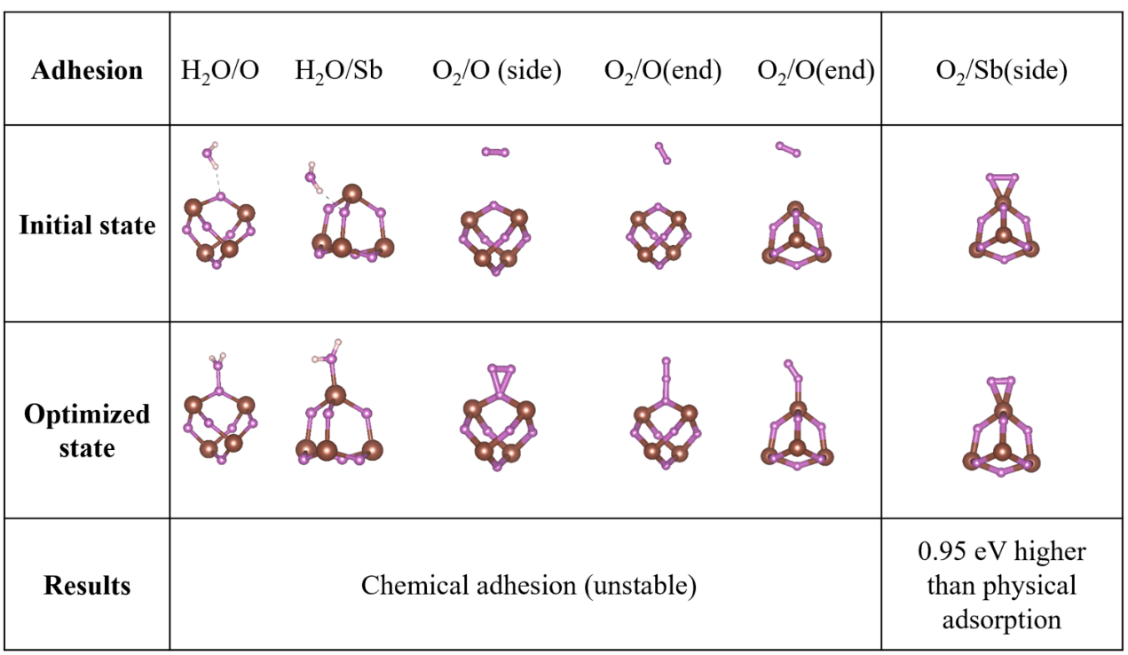


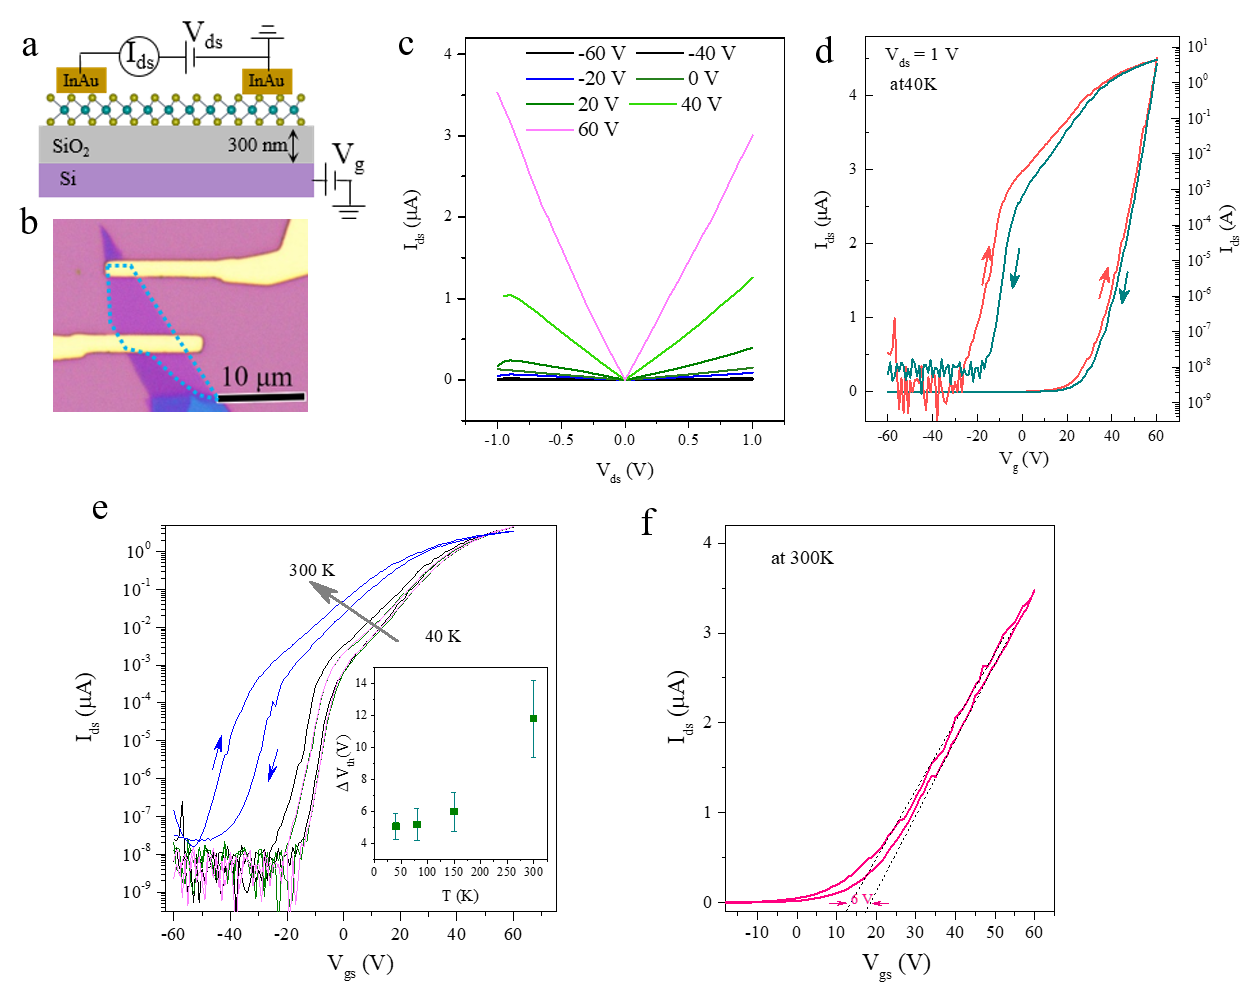


Figure S13: Electrical performance of monolayer MoS2/SiO2 FET. a, Schematic figure of monolayer MoS2/SiO2 FET. b, Optical image of monolayer MoS2/SiO2 FET. c, Output curves of monolayer MoS2/SiO2 FET measured at 40 K. d transfer characteristic curves of at 40 K. e, the temperature-dependent transfer characteristic curves of monolayer MoS2/Sb2O3 FET. Inset: the variation of onset voltage ΔVon at various temperature. e,the transfer characteristic curves at 300 K, from which we extract the threshold voltage variation Vth at 300 K.


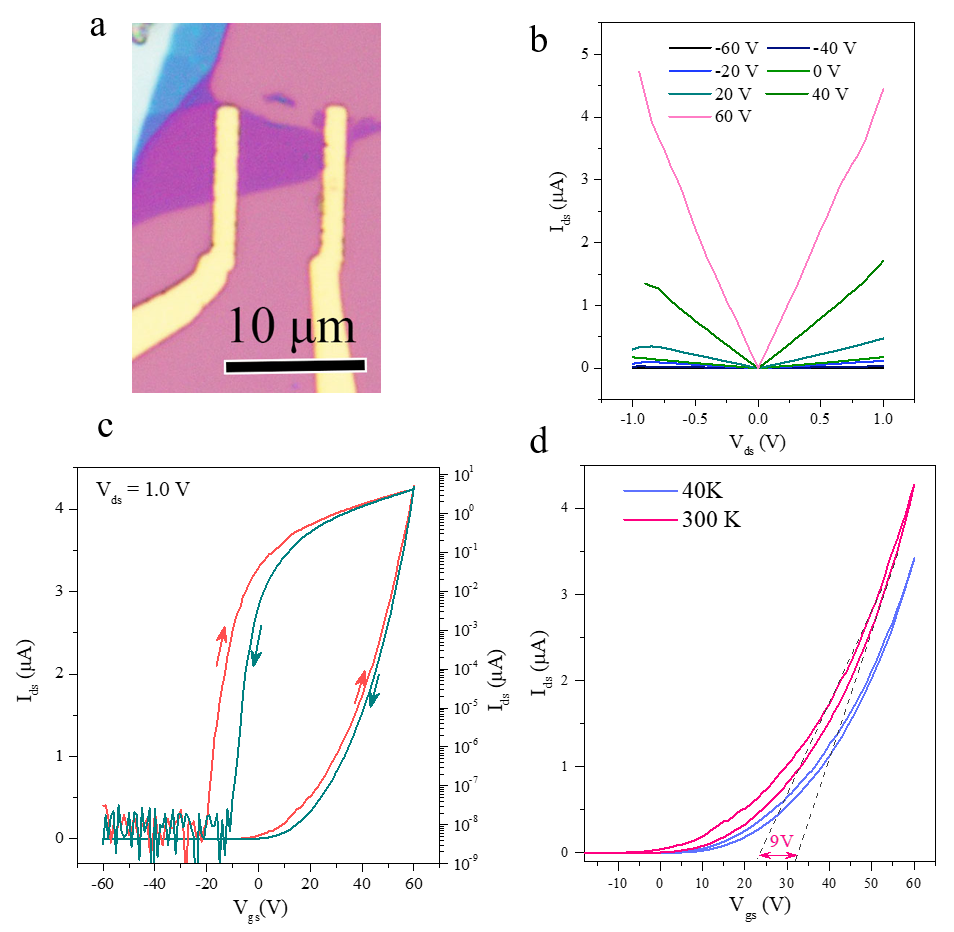
Figure S14: Electrical performance of bilayer MoS2/SiO2 FET. a, Optical image of bilayer MoS2/SiO2 FET. b, The output curves of bilayer MoS2/SiO2 FET measured at 40 K. c, the transfer characteristic curves of at 40 K. d, the transfer characteristic curves at 40 K and 300 K for the extraction of ΔVth.


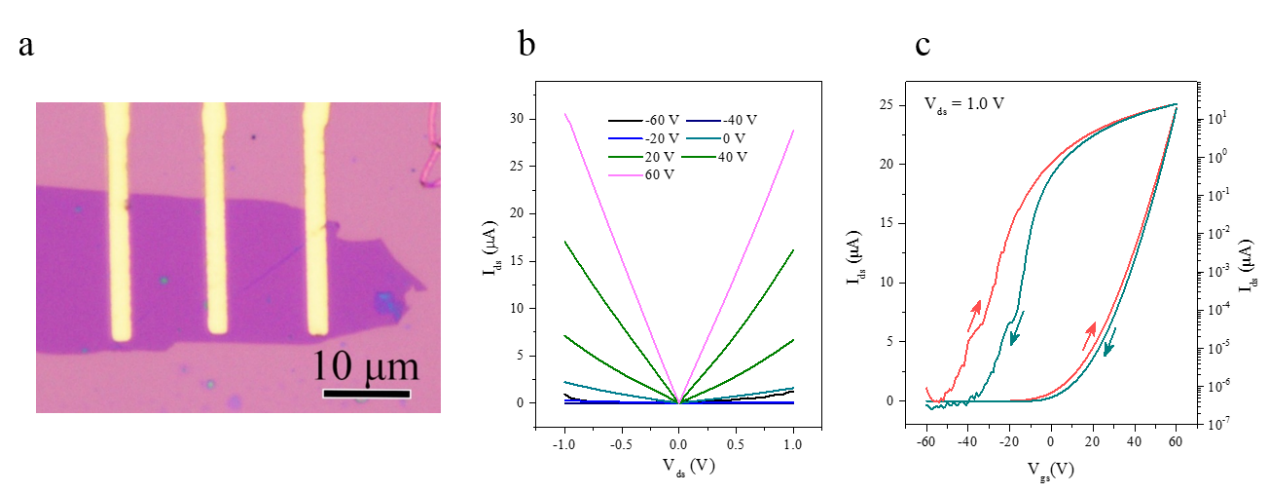
Figure S15: Electrical performance of trilayer MoS2/SiO2 FET. a, Optical image of trilayer MoS2/SiO2 FET. b, The output curves of trilayer MoS2/SiO2 FET measured at 40 K. c, its transfer characteristic curves of at 40 K.

**Reference**

1. Hafner, J., Ab‐initio simulations of materials using VASP: Density‐functional theory and beyond. *J. Comput. Chem.* **29** , 2044-2078 (2008).
2. Blöchl, P. E., Projector augmented-wave method. *Phys. Rev. B* **50**, 17953-17979 (1994).
3. Perdew, J. P.; Burke, K.; Ernzerhof, M., Generalized gradient approximation made simple. *Phys. Rev. Lett.* **77**, 3865-3868 (1996).
4. Klimeš, J.; Bowler, D. R.; Michaelides, A., Van der Waals density functionals applied to solids. *Phys. Rev. B* **83**, 19513 (2011)**.**
5. Heyd, J.; Scuseria, G. E.; Ernzerhof, M., Hybrid functionals based on a screened Coulomb potential. *J. Chem. Phys.* **118** , 8207-8215 (2003)
6. Sheng, P.; Abeles, B.; Arie, Y., Hopping Conductivity in Granular Metals. *Phys. Rev. Lett.* **31**, 44-47 (1973).
7. Carey, J. J.; Allen, J. P.; Scanlon, D. O.; Watson, G. W., The electronic structure of the antimony chalcogenide series: Prospects for optoelectronic applications. *J. Solid State Chem.* **213**, 116-125 (2014).
8. Matsumoto, A.; Koyama, Y.; Togo, A.; Choi, M.; Tanaka, I., Electronic structures of dynamically stable As2O3, Sb2O3, and Bi2O3 crystal polymorphs. *Phys. Rev. B* **83**, 214110 (2011)**.**
9. Liu, Y., Stradins, P. & Wei, S.-H. Van der Waals metal–semiconductor junction: weak Fermi level pinning enables effective tuning of Schottky barrier. *Sci. Adv.* **2**, e1600069 (2016).
